# Supplementary material
Source: PubMed Central journal article supplement (PMC8178441)
Supplement: mmc1.pdf [file mmc1.pdf]

YMTHE, Volume 29

## **Supplemental Information**

**Imbalance of TGF- $\beta$ 1/BMP-7 pathways induced  
by M2-polarized macrophages promotes  
hepatocellular carcinoma aggressiveness**

**Junya Ning, Yingnan Ye, Dechao Bu, Gang Zhao, Tianqiang Song, Pengpeng Liu, Wenwen Yu, Hailong Wang, Hui Li, Xiubao Ren, Guoguang Ying, Yi Zhao, and Jinpu Yu**

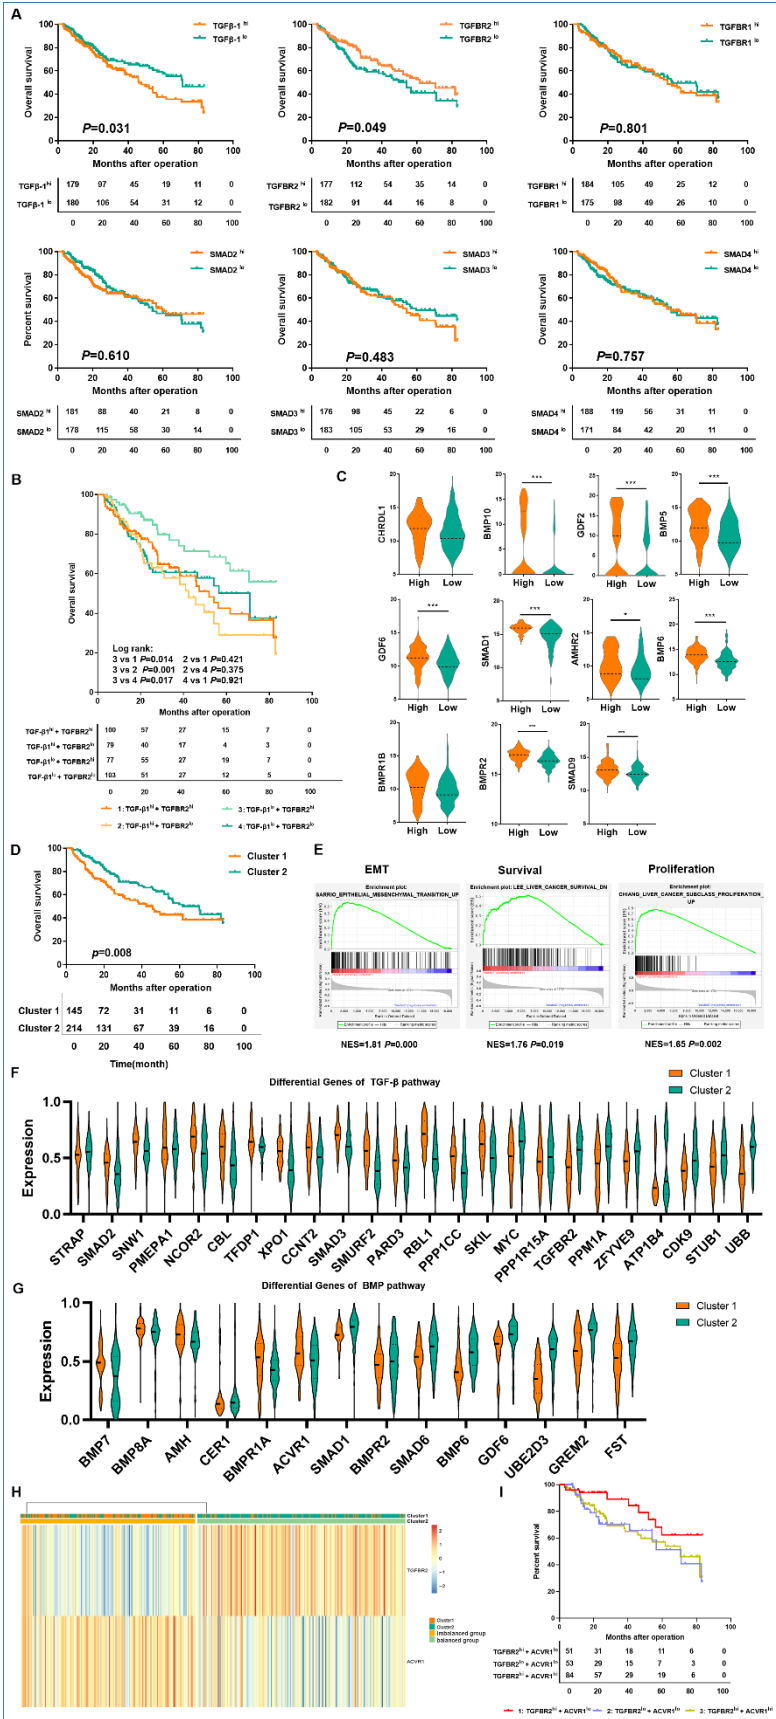

**Supplementary Fig. 1. The imbalance of TGF- $\beta$ 1/BMP-7 pathways was detected at the mRNA level in HCC and was associated with poor clinical outcomes.** (A) Kaplan-Meier analysis of TGF- $\beta$ 1 pathway components from 359 HCC samples from TCGA cohort patients. (B) Kaplan-Meier analysis of the survival of patients with TGF- $\beta$ 1<sup>hi</sup>TGFBR2<sup>hi</sup> versus TGF- $\beta$ 1<sup>hi</sup>TGFBR2<sup>lo</sup> versus TGF- $\beta$ 1<sup>lo</sup>TGFBR2<sup>hi</sup> versus TGF- $\beta$ 1<sup>lo</sup>TGFBR2<sup>lo</sup> expression in the TCGA cohort. (C) Differential gene expression of BMP pathway components between TGFBR2<sup>hi</sup> and TGFBR2<sup>lo</sup> HCC tissues in the TCGA cohort. (D) Kaplan-Meier survival analysis showing the OS of the patients in cluster 1 and cluster 2. (E) GSEA identified differential enrichment of EMT-, liver cancer survival- and proliferation-related gene sets in cluster 1 compared with cluster 2. (F-G) Differentially expressed genes of the TGF- $\beta$  and BMP pathways in cluster 1 compared with cluster 2. (H) A total of 359 HCC samples from the TCGA were clustered into 2 groups according to the expression of TGFBR2 and ACVR1. (I) The balanced group was separated into TGFBR2<sup>hi</sup>ACVR1<sup>lo</sup>, TGFBR2<sup>lo</sup>ACVR1<sup>lo</sup> and TGFBR2<sup>hi</sup>ACVR1<sup>hi</sup> based on their median data, Kaplan-Meier survival analysis was used to analyze the OS in patients of the three groups.

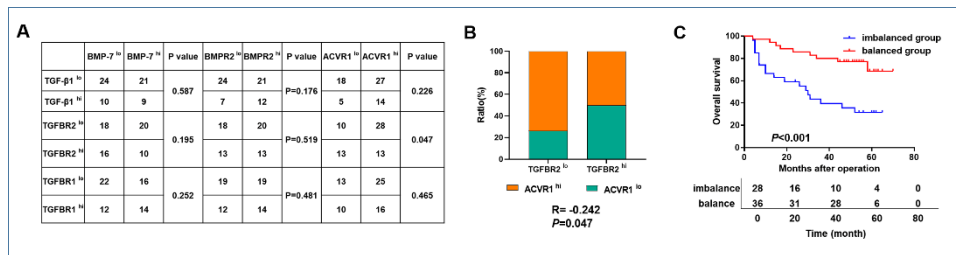

**Supplementary Fig. 2. The imbalance of TGF- $\beta$ 1/BMP-7 pathways was validated at the protein level in HCC and was associated with aggressive pathological features and poor clinical outcomes.** (A) Correlations between the components of the TGF- $\beta$ 1 and BMP-7 pathways. (B) Correlation between TGFBR2 expression and ACVR1 expression in cohort I. (C) Kaplan-Meier survival curves for patients in the imbalanced group and balanced group.

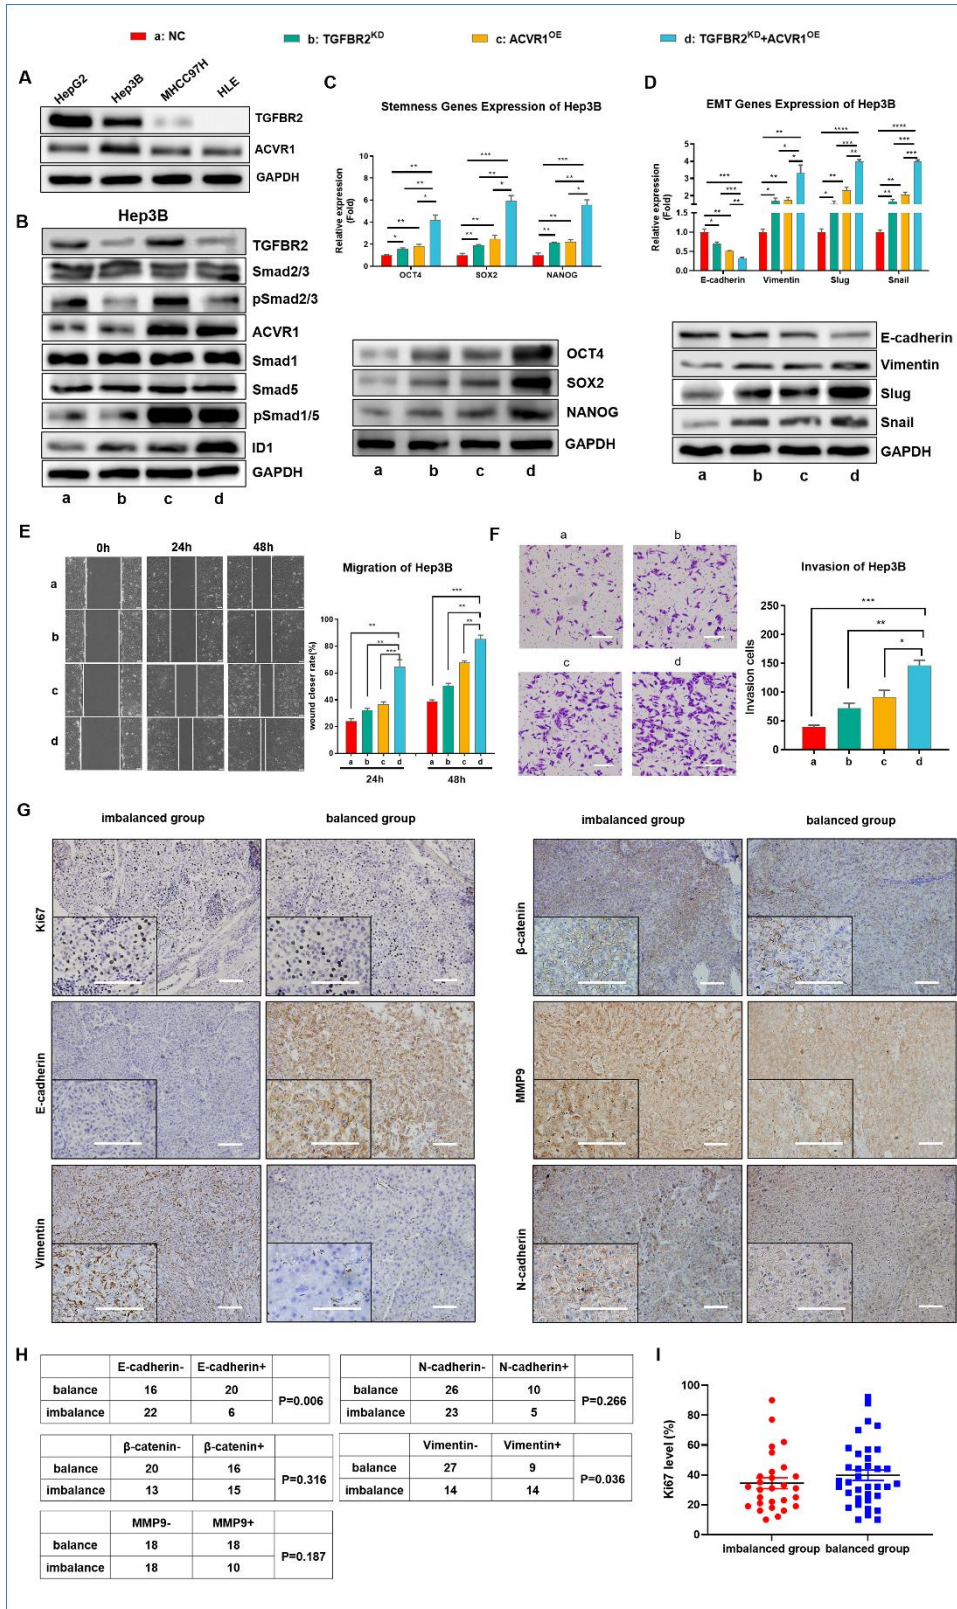

**Supplementary Fig. 3. The imbalance of TGF- $\beta$ 1/BMP-7 pathways dramatically promoted HCC cell invasion by upregulating EMT and stemness via increasing**

**inhibitor of differentiation (ID1).** (A) TGFBR2 and ACVR1 expression at the protein level among HepG2, Hep3B, MHCC97H and HLE cells, as detected by western blot assay. Abbreviations: GAPDH, glyceraldehyde 3-phosphate dehydrogenase. (B) Western blotting of the levels of TGF- $\beta$ 1/BMP-7 pathway components in Hep3B cells with separate or simultaneous TGFBR2 knockdown and ACVR1 overexpression. (C) PCR and western blotting of stem cell-related genes, including OCT4, SOX2 and NANOG, in Hep3B cells. (D) PCR and western blotting of EMT-related genes, including E-cadherin, vimentin, slug and snail, in Hep3B cells. (E) Wound healing assay in Hep3B cells at 24 and 48 h. Scale bars, 200 $\mu$ m. (F) Transwell assay after 24 h in Hep3B cells. Scale bars, 100 $\mu$ m. (G) Tumor proliferation- and invasion-related biomarkers, including Ki67, E-cadherin, N-cadherin,  $\beta$ -catenin, vimentin and MMP9, in the imbalanced group and balanced group. Scale bars, 50 $\mu$ m. (H) The chi-square test was used to analyze the correlation between EMT biomarkers and imbalance of the TGF $\beta$ 1/BMP-7 pathways. (I) The distribution of Ki67 expression in the imbalanced and balanced groups was analyzed by Student's t test. For all panels, \*P < 0.05, \*\*P < 0.01, \*\*\*P < 0.001.

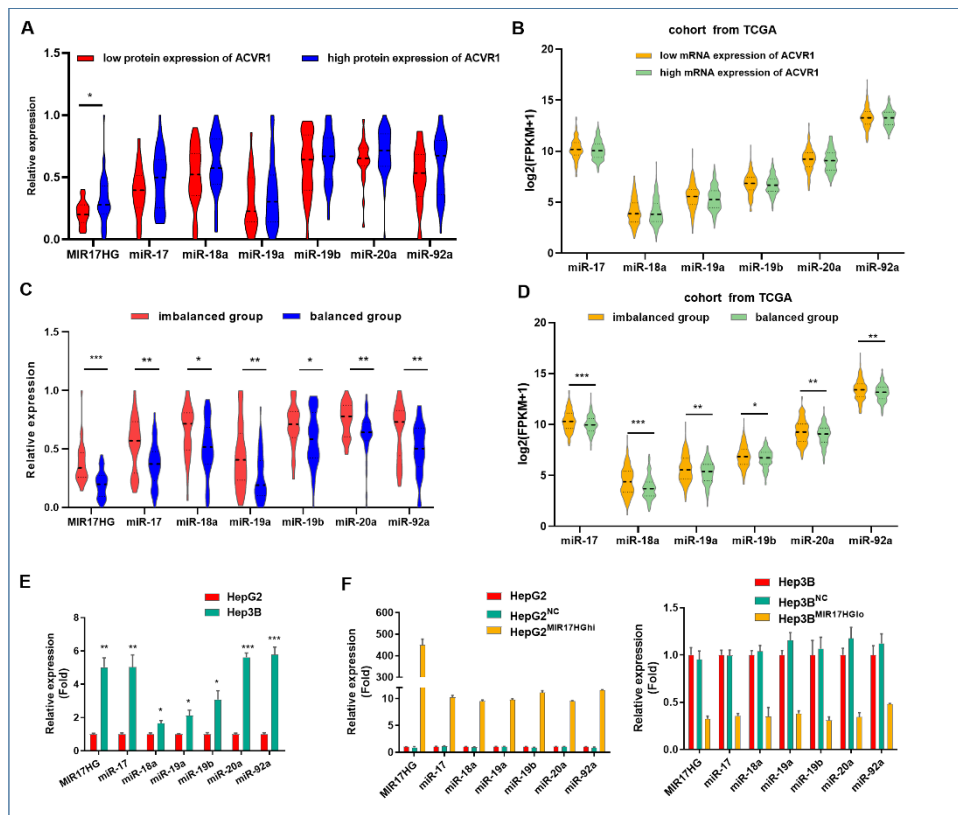

**Supplementary Fig. 4. MiR-17-92 cluster promoted the imbalance of TGF- $\beta$ 1/BMP-7 pathways by interfering with TGFBR2 mRNA expression and enhancing ACVR1 protein expression via Smurf1 silencing.** (A) MIR17HG and miR-17-92 cluster in patients in cohort I with high ACVR1 expression and low ACVR1 expression when the

patients were separated by ACVR1 protein level in cohort I and (B) when the patients were separated by ACVR1 mRNA level in the TCGA cohort. (C) Expression of the MIR17HG and miR-17-92 cluster in the imbalanced group and balanced group in cohort I. (D) The levels of miR-17-92 cluster in the imbalanced group and balanced group in the TCGA cohort. \*P < 0.05, \*\*P < 0.01, \*\*\*P < 0.001. (E) The expression of MIR17HG and miR-17-92 cluster in HepG2 and Hep3B cells was detected by PCR. (F) MIR17HG was overexpressed in HepG2 cells and knocked down in Hep3B cells, and the expression of MIR17HG and miR-17-92 cluster members was detected by PCR. For all panels, \*P < 0.05, \*\*P < 0.01, \*\*\*P < 0.001.

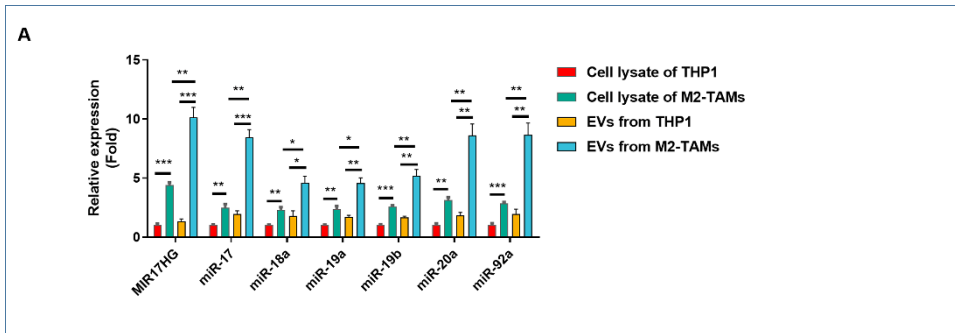

**Supplementary Fig. 5. M2-TAMs increased the levels of MIR17HG and miR-17-92 cluster in HCC cells via EVs to exacerbate the imbalance of TGF- $\beta$ 1/BMP-7 pathway.** (A) The levels of MIR17HG and miR-17-92 cluster in the cell lysates and EVs of M2-TAMs were detected by PCR.

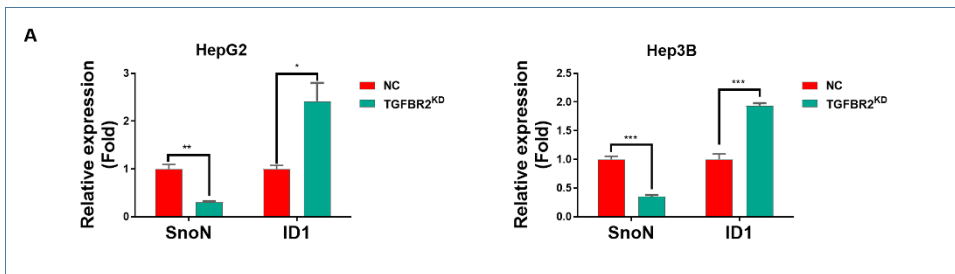

**Supplementary Fig. 6. TGFBR2 KD increased ID1 expression by inhibiting SnoN without affecting the activating step for Smad1/5/8.** (A) PCR array of SnoN and ID1 expression in TGFBR2<sup>KD</sup> HepG2 cells and TGFBR2<sup>KD</sup> Hep3B cells compared with those NC treated cells. \*P < 0.05, \*\*P < 0.01, \*\*\*P < 0.001.

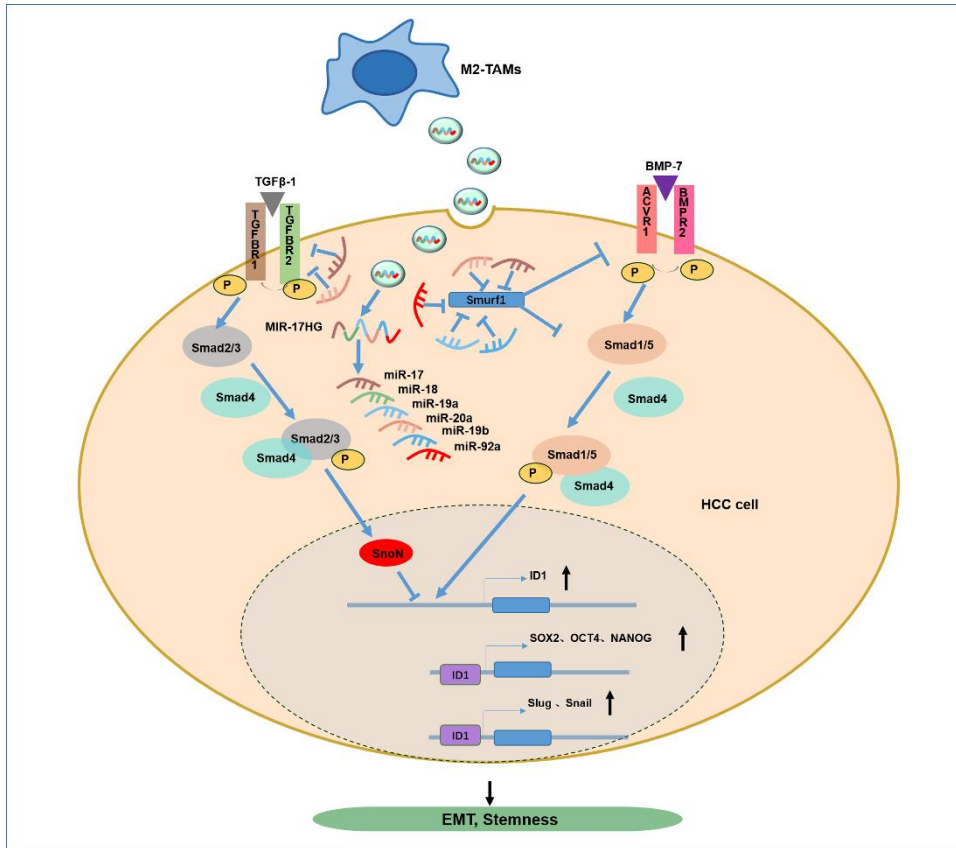

**Supplementary Fig. 7. The proposed model illustrates the mechanism by which M2-TAMs induce the imbalance of TGF-β1 and BMP-7 pathways in HCC to control HCC progression.** In the HCC microenvironment, M2-TAMs transmit EVs containing lncRNA MIR17HG and miR-17-92 cluster to HCC cells; these components target TGFBR2 and Smurf1 in HCC, thus suppressing the TGF-β1 pathway and promoting the BMP-7 pathway. This imbalance upregulates ID1, a direct target gene of BMP-7, and promotes HCC cell EMT and stemness.

**Supplementary Table 1. Clinical and pathological features of 359 HCC patients in the imbalanced group and balanced group.**

| Clinical parameters | imbalanced group | balanced group | <i>P</i> Value |
|---------------------|------------------|----------------|----------------|
| Gender              |                  |                |                |
| Male                | 95(57.9%)        | 144(73.8%)     | 0.002*         |
| Female              | 69(42.1%)        | 51(26.2%)      |                |
| Age(year)           |                  |                |                |
| ≤60                 | 82(50.0%)        | 86(44.1%)      | 0.156          |
| >60                 | 82(50.0%)        | 109(55.9%)     |                |
| Cirrhosis           |                  |                |                |
| yes                 | 45(54.9%)        | 77(59.7%)      | 0.292          |
| no                  | 37(45.1%)        | 52(40.3%)      |                |
| AFP (ng/ml)         |                  |                |                |
| Abnormal (>20)      | 67(59.8%)        | 57(37.7%)      | 0.000*         |
| Normal (≤20)        | 45(40.2%)        | 94(62.3%)      |                |
| Histologic grade    |                  |                |                |
| G1                  | 18(11.2%)        | 35(18.3%)      | 0.074          |
| G2                  | 72(44.7%)        | 95(49.7%)      |                |
| G3                  | 65(40.4%)        | 55(28.8%)      |                |
| G4                  | 6(3.7%)          | 6(3.1%)        |                |
| Pathologic T-stage  |                  |                |                |
| T1                  | 67(40.9%)        | 106(54.9%)     | 0.018*         |
| T2                  | 44(26.8%)        | 46(23.8%)      |                |
| T3/4                | 53(32.3%)        | 41(21.2%)      |                |
| Pathologic N-stage  |                  |                |                |
| N0                  | 119(72.6%)       | 125(64.8%)     | 0.071          |
| N1/Nx               | 45(27.4%)        | 68(35.2%)      |                |
| Pathologic M-stage  |                  |                |                |
| M0                  | 124(75.6%)       | 130(66.7%)     | 0.041*         |
| M1/Mx               | 40(24.4%)        | 65(33.3%)      |                |
| AJCC Stage          |                  |                |                |
| Stage1              | 63(41.2%)        | 103(57.2%)     | 0.004*         |
| Stage2              | 38(24.8%)        | 42(23.3%)      |                |
| Stage3/4            | 52(34.0%)        | 35(19.4%)      |                |
| Vascular invasion   |                  |                |                |
| yes                 | 52(40.3%)        | 51(29.5%)      | 0.033*         |
| no                  | 77(59.7%)        | 122(70.5%)     |                |

**Supplementary Table 2. Univariate and multivariate analyses of clinicopathologic parameters associated with OS and DFS.**

**Supplementary Table 3. Correlations between the imbalance of the TGF-β1/BMP-7 pathways and clinicopathologic parameters.**



**Supplementary Table 4. Primary antibodies for western blotting and IHC.**

| Protein          | Concentration for WB | Concentration for IHC | Specificity | Company                   |
|------------------|----------------------|-----------------------|-------------|---------------------------|
| TGF- $\beta$ 1   | /                    | 10 $\mu$ g/ml         | Rabbit      | Abcam                     |
| TGFBR2           | 2 $\mu$ g/ml         | /                     | Goat        | R&D Systems               |
| TGFBR2           | /                    | 1:200                 | Mouse       | Abcam                     |
| TGFBR1           | 1:200                | 1:50                  | Rabbit      | Abcam                     |
| BMP-7            | /                    | 4 $\mu$ g/ml          | Rabbit      | Abcam                     |
| BMPR2            | 1:100                | 1:200                 | Mouse       | Abcam                     |
| ACVR1            | /                    | 1:200                 | Rabbit      | Abcam                     |
| Ki67             |                      | 1:500                 | Mouse       | Santa Cruz                |
| E-cadherin       |                      | 1:100                 | Mouse       | Santa Cruz                |
| N-cadherin       |                      | 1:200                 | Mouse       | Santa Cruz                |
| Vimentin         |                      | 1:200                 | Mouse       | Santa Cruz                |
| OCT4             | 1:1000               |                       | Rabbit      | Abcam                     |
| SOX2             | 1:1000               |                       | Rabbit      | Abcam                     |
| NANOG            | 1:1000               |                       | Rabbit      | Abcam                     |
| MMP9             |                      | 1:200                 | Mouse       | Santa Cruz                |
| $\beta$ -catenin |                      | 1:400                 | Mouse       | Abcam                     |
| ACVR1            | 1:1000               | /                     | Rabbit      | Cell Signaling Technology |
| Smad2/3          | 1:1000               | /                     | Rabbit      | Cell Signaling Technology |
| pSmad2/3         | 1:1000               | /                     | Rabbit      | Cell Signaling Technology |
| Smad1            | 1:1000               | /                     | Rabbit      | Cell Signaling Technology |
| Smad5            | 1:1000               | /                     | Rabbit      | Cell Signaling Technology |
| pSmad1/5/8       | 1:1000               | /                     | Rabbit      | Cell Signaling Technology |
| ID1              | 1:100                | 1:50                  | Mouse       | Santa Cruz                |
| Smurf1           | 1:1000               | /                     | Rabbit      | Cell Signaling Technology |
| E-cadherin       | 1:1000               | 1:200                 | Rabbit      | Cell Signaling Technology |
| Vimentin         | 1:1000               | 1:200                 | Rabbit      | Cell Signaling Technology |
| Slug             | 1:1000               | /                     | Rabbit      | Cell Signaling Technology |
| Snail            | 1:1000               | /                     | Rabbit      | Cell Signaling Technology |
| GAPDH            | 1:10000              | /                     | Rabbit      | Cell Signaling Technology |
| CD68             | /                    | 1:500                 | Rabbit      | Invitrogen                |
| CD163            | /                    | 1:100                 | Rabbit      | ZSGB-BIO                  |
| CD66b            | /                    | 1:400                 | Rabbit      | Abcam                     |

**Supplementary Table 5. Multispectral IF staining.**

| Position | Antibody | Company                             | Dilution   | Incubation       | TSA dyes |
|----------|----------|-------------------------------------|------------|------------------|----------|
| 1        | HepPar-1 | ZSGB-BIO                            | 1:500      | 4°C<br>overnight | 690      |
| 2        | CD163    | ZSGB-BIO                            | 1:500      | 4°C<br>overnight | 570      |
| 3        | CD68     | Invitrogen                          | 1:2000     | 4°C<br>overnight | 650      |
| 4        | TGFBR2   | Abcam                               | 1:500      | 4°C<br>overnight | 520      |
| 5        | ACVR1    | Abcam                               | 1:500      | 4°C<br>overnight | 620      |
| 6        | DAPI     | Perkin<br>Elmer Opal<br>7-color kit | 2 drops/ml | 5 min            |          |

**Supplementary Table 6. Primers used in the study.**
